# Supplementary material
Source: Copernicus journal article supplement (doi:10.5194/egusphere-2026-2329)
Supplement: Supplementary file 1 [file egusphere-2026-2329-supplement.pdf]

# When the fjords take a breath: Influence of wind forcing and Ekman dynamics on deep ventilation in the North Patagonian fjords

Sola-Hidalgo Camila<sup>1,2,3</sup>, Pérez-Santos Iván<sup>2,4\*</sup>, Castillo Manuel I.<sup>3,6</sup>, Cornejo Marcela<sup>1,5</sup>, Baldrich Ángela<sup>4</sup>, Castillo-Álvarez Maybelline<sup>7,8</sup>

<sup>1</sup> Programa de Magíster en Oceanografía, Universidad de Valparaíso y Pontificia Universidad Católica

<sup>2</sup> Centro de Investigación Oceanográfica COPAS COASTAL, Universidad de Concepción, Concepción, Chile

<sup>3</sup> Laboratorio de Oceanografía Física y Satelital (LOFiSat), Universidad de Valparaíso, Valparaíso, Chile

<sup>4</sup> Centro i~mar, Universidad de Los Lagos, Puerto Montt, Chile

<sup>5</sup> Escuela de Ciencias del Mar, Pontificia Universidad Católica de Valparaíso, Valparaíso, Chile

<sup>6</sup> Centro de Observación y Análisis del océano Costero (COSTAR-UV), Valparaíso, Chile

<sup>7</sup> Postgraduate Program in Oceanography, Department of Oceanography, Faculty of Natural Sciences and Oceanography Universidad de Concepción, Chile

<sup>8</sup> Millennium Institute of Oceanography (IMO), Universidad de Concepción, Chile

Correspondence to: Iván Pérez Santos ([ivan.perez@ulagos.cl](mailto:ivan.perez@ulagos.cl))

**Table S1. Hydrographic and wind-driven forcing conditions during grouped ventilated periods at 170 m depth in Guafo Mouth (2016–2024). Values correspond to the period means of dissolved oxygen (DO,  $\mu\text{mol L}^{-1}$ ), conservative temperature (CT,  $^{\circ}\text{C}$ ), absolute salinity (SA,  $\text{g kg}^{-1}$ ), and potential density anomaly ( $\sigma_{\theta}$ ,  $\text{kg m}^{-3}$ ). Ventilation intensity is quantified as  $\Delta\text{AOU}$  ( $\mu\text{mol L}^{-1}$ ), defined as the decrease in apparent oxygen utilization (AOU) from the onset of each period to its minimum value. Wind forcing is represented by meridional wind stress ( $\tau_y$ ,  $\text{N m}^{-2}$ ), Ekman pumping velocity ( $W_E$ ,  $\text{m d}^{-1}$ ), total Ekman forcing (Ek total,  $\text{m}^3 \text{s}^{-1} \text{m}^{-1}$ ), and its anomaly relative to the annual mean ( $\Delta\text{Ek total}$ ,  $\text{m}^3 \text{s}^{-1} \text{m}^{-1}$ ). Positive Ek total values indicate upwelling-favourable conditions, whereas negative values indicate downwelling-dominated forcing.**

| ID | DO<br>( $\mu\text{mol L}^{-1}$ ) | $\Delta\text{AOU}$<br>( $\mu\text{mol L}^{-1}$ ) | CT<br>( $^{\circ}\text{C}$ ) | SA<br>( $\text{g kg}^{-1}$ ) | $\sigma$<br>( $\text{kg m}^{-3}$ ) | $\tau_y$<br>( $\text{N m}^{-2}$ ) | $W_E$ (m)<br>( $\text{d}^{-1}$ ) | Ek total<br>( $\text{m}^3 \text{s}^{-1} \text{m}^{-1}$ ) | $\Delta\text{Ek total}$<br>( $\text{m}^3 \text{s}^{-1} \text{m}^{-1}$ ) |
|----|----------------------------------|--------------------------------------------------|------------------------------|------------------------------|------------------------------------|-----------------------------------|----------------------------------|----------------------------------------------------------|-------------------------------------------------------------------------|
| 1  | 172.002                          | 87.084                                           | 9.710                        | 34.061                       | 26.146                             | -0.058                            | -0.139                           | <b>-0.639</b>                                            | -0.356                                                                  |
| 2  | 208.150                          | 68.882                                           | 10.385                       | 34.108                       | 26.069                             | -0.146                            | -0.484                           | <b>-1.689</b>                                            | -1.080                                                                  |
| 3  | 170.018                          | 3.247                                            | 7.358                        | 34.503                       | 26.851                             | -0.012                            | 0.137                            | <b>-0.034</b>                                            | 0.575                                                                   |
| 4  | 144.934                          | 8.967                                            | 8.024                        | 34.488                       | 26.742                             | -0.012                            | 0.047                            | <b>-0.087</b>                                            | 0.357                                                                   |
| 5  | 141.351                          | 34.856                                           | 8.999                        | 34.359                       | 26.492                             | -0.044                            | -0.059                           | <b>-0.458</b>                                            | -0.014                                                                  |
| 6  | 141.698                          | 45.304                                           | 10.126                       | 34.082                       | 26.093                             | -0.055                            | -0.185                           | <b>-0.641</b>                                            | -0.260                                                                  |
| 7  | 125.674                          | 32.500                                           | 9.078                        | 34.217                       | 26.370                             | -0.034                            | -0.011                           | <b>-0.335</b>                                            | 0.047                                                                   |
| 8  | 139.052                          | 20.783                                           | 8.588                        | 33.103                       | 25.580                             | -0.022                            | 0.037                            | <b>-0.194</b>                                            | 0.199                                                                   |
| 9  | 131.249                          | 10.732                                           | 9.521                        | 34.181                       | 26.270                             | -0.067                            | -0.116                           | <b>-0.714</b>                                            | -0.338                                                                  |
| 10 | 148.787                          | 26.932                                           | 7.776                        | 34.435                       | 26.737                             | -0.010                            | 0.092                            | <b>-0.047</b>                                            | 0.329                                                                   |
| 11 | 131.585                          | 7.789                                            | 8.153                        | 34.262                       | 26.547                             | 0.020                             | 0.088                            | 0.246                                                    | 0.601                                                                   |
| 12 | 143.810                          | 37.207                                           | 9.421                        | 34.101                       | 26.224                             | -0.045                            | 0.049                            | <b>-0.407</b>                                            | -0.052                                                                  |
| 13 | 134.203                          | 19.600                                           | 8.610                        | 34.359                       | 26.553                             | -0.022                            | 0.059                            | <b>-0.179</b>                                            | 0.176                                                                   |
| 14 | 135.296                          | 53.748                                           | 10.234                       | 34.086                       | 26.077                             | -0.080                            | -0.322                           | <b>-0.964</b>                                            | -0.455                                                                  |
| 15 | 122.576                          | 16.432                                           | 8.591                        | 34.426                       | 26.608                             | -0.046                            | -0.037                           | <b>-0.470</b>                                            | 0.039                                                                   |
| 16 | 121.919                          | 27.300                                           | 8.913                        | 34.175                       | 26.362                             | -0.040                            | -0.029                           | <b>-0.405</b>                                            | -0.052                                                                  |

**Table S2. Characteristics of the ventilation pulses identified in the dissolved oxygen time series at ~170 m depth in the Guafo Mouth mooring. For each pulse, the table includes the start date, duration (Days), minimum apparent oxygen utilization ( $AOU_{min}$ ), and maximum dissolved oxygen concentration ( $DO_{max}$ ). Hydrographic conditions are represented by the initial and final conservative temperature ( $CT_{ini}$ ,  $CT_{fin}$ ) and absolute salinity ( $SA_{ini}$ ,  $SA_{fin}$ ), together with their net changes during the pulse ( $\Delta CT$  and  $\Delta SA$ ). Wind forcing is described by the total Ekman transport during the 5 d preceding the pulse ( $Ek_{total\ 5dpre}$ ) and during the pulse itself ( $Ek_{total}$  during), as well as their difference ( $\Delta Ek_{total}$ ). The last column (Period context) indicates whether the pulse occurred within an identified ventilated period or outside ventilated periods.**

| Pulse ID | Start date | Da ys | $AOU_{min}$ | $DO_{max}$  | $CT_{ini}$ | $CT_{fin}$ | $\Delta CT$ | $SA_{ini}$ | $SA_{fin}$ | $\Delta SA$ | $Ek_{total\ 5dpre}$ | $Ek_{total}$ (during ) | Period Context |
|----------|------------|-------|-------------|-------------|------------|------------|-------------|------------|------------|-------------|---------------------|------------------------|----------------|
| 1        | 19-06-16   | 2     | 144.11<br>0 | 140.08<br>7 | 9.676      | 9.949      | 0.273       | 34.271     | 34.152     | -0.11<br>9  | -0.189              | 0.096                  | outside        |
| 2        | 22-07-16   | 2     | 126.04<br>7 | 158.28<br>5 | 9.732      | 9.963      | 0.231       | 34.154     | 34.037     | -0.11<br>7  | -1.658              | 0.577                  | P1             |
| 3        | 02-08-16   | 2     | 75.888      | 206.73<br>9 | 10.130     | 10.281     | 0.151       | 33.930     | 33.902     | -0.02<br>8  | -2.333              | -1.933                 | P1             |
| 4        | 12-08-16   | 3     | 92.879      | 190.45<br>5 | 9.871      | 10.161     | 0.290       | 34.118     | 33.920     | -0.19<br>8  | -1.594              | -1.505                 | P1             |
| 5        | 02-09-16   | 2     | 81.133      | 202.54<br>4 | 10.084     | 10.144     | 0.060       | 33.883     | 33.796     | -0.08<br>6  | -1.205              | 0.410                  | P1             |
| 6        | 06-09-16   | 2     | 67.153      | 216.12<br>2 | 10.114     | 10.229     | 0.115       | 33.902     | 33.734     | -0.16<br>8  | 0.255               | -1.552                 | P1             |
| 7        | 03-10-16   | 2     | 98.380      | 187.88<br>8 | 9.362      | 9.656      | 0.295       | 34.147     | 34.020     | -0.12<br>7  | -0.295              | -0.690                 | P1             |
| 8        | 23-10-16   | 4     | 102.52<br>6 | 183.78<br>2 | 9.145      | 9.639      | 0.494       | 34.231     | 34.055     | -0.17<br>6  | 0.205               | 0.060                  | P1             |
| 9        | 08-08-17   | 6     | 70.210      | 209.24<br>0 | 9.624      | 10.431     | 0.807       | 34.489     | 34.147     | -0.34<br>2  | -2.005              | -3.285                 | P2             |
| 10       | 18-08-17   | 11    | 40.432      | 239.41<br>4 | 9.992      | 10.667     | 0.675       | 34.336     | 33.834     | -0.50<br>2  | -1.214              | -2.292                 | P2             |
| 11       | 04-09-17   | 4     | 34.642      | 246.57<br>2 | 10.407     | 10.486     | 0.079       | 34.093     | 34.004     | -0.08<br>9  | -2.009              | -1.801                 | P2             |
| 12       | 10-09-18   | 4     | 154.30<br>3 | 133.50<br>9 | 9.328      | 9.334      | 0.005       | 34.409     | 34.269     | -0.14<br>0  | -1.126              | -0.424                 | outside        |
| 13       | 31-12-18   | 2     | 188.18<br>4 | 100.67<br>3 | 8.956      | 9.141      | 0.185       | 34.472     | 34.359     | -0.11<br>3  | -0.531              | -0.390                 | outside        |
| 14       | 25-03-19   | 4     | 174.93<br>1 | 117.71<br>0 | 8.974      | 8.660      | -0.314      | 34.075     | 34.013     | -0.06<br>2  | -0.201              | 0.402                  | outside        |
| 15       | 02-06-19   | 6     | 180.16<br>2 | 105.66<br>4 | 9.292      | 9.654      | 0.361       | 34.589     | 34.257     | -0.33<br>2  | -0.799              | -1.712                 | outside        |
| 16       | 16-07-19   | 4     | 116.23<br>2 | 169.96<br>5 | 9.856      | 10.308     | 0.452       | 34.274     | 33.964     | -0.31<br>0  | -2.931              | -0.907                 | P6             |
| 17       | 07-09-19   | 2     | 141.62<br>5 | 146.94<br>1 | 9.307      | 9.254      | -0.05<br>4  | 34.207     | 34.139     | -0.06<br>8  | 0.669               | -0.497                 | P7             |
| 18       | 29-09-19   | 2     | 167.35<br>0 | 129.89<br>6 | 8.624      | 8.693      | 0.068       | 34.098     | 34.034     | -0.06<br>4  | -0.240              | -0.838                 | P7             |
| 19       | 23-03-20   | 3     | 198.27<br>2 | 90.114      | 9.052      | 9.216      | 0.164       | 34.516     | 34.355     | -0.16<br>0  | -1.265              | -1.482                 | outside        |
| 20       | 24-07-20   | 6     | 142.31<br>7 | 145.19<br>3 | 9.903      | 10.136     | 0.233       | 33.793     | 33.568     | -0.22<br>6  | 0.194               | -0.077                 | outside        |

|    |          |   |             |             |        |        |       |        |        |            |        |        |         |
|----|----------|---|-------------|-------------|--------|--------|-------|--------|--------|------------|--------|--------|---------|
| 21 | 06-08-20 | 4 | 129.56<br>6 | 154.06<br>8 | 9.973  | 10.333 | 0.360 | 33.435 | 33.216 | -0.22<br>0 | -2.052 | -0.850 | outside |
| 22 | 11-08-20 | 2 | 116.96<br>2 | 167.39<br>0 | 10.149 | 10.185 | 0.036 | 33.330 | 33.315 | -0.01<br>5 | -0.459 | -0.184 | outside |
| 23 | 23-05-21 | 5 | 195.96<br>3 | 92.316      | 9.162  | 9.236  | 0.073 | 34.468 | 34.277 | -0.19<br>2 | -1.996 | -1.045 | outside |
| 24 | 12-07-22 | 2 | 151.14<br>1 | 147.23<br>7 | 9.175  | 9.307  | 0.132 | 34.222 | 34.087 | -0.13<br>5 | -2.786 | -1.343 | P12     |
| 25 | 15-07-22 | 5 | 119.52<br>9 | 167.99<br>8 | 9.290  | 9.502  | 0.212 | 34.099 | 33.940 | -0.15<br>9 | -1.033 | -1.284 | P12     |
| 26 | 12-08-22 | 4 | 154.74<br>3 | 135.83<br>6 | 9.621  | 9.665  | 0.044 | 34.463 | 34.242 | -0.22<br>2 | -0.861 | -1.750 | outside |
| 27 | 13-09-22 | 2 | 157.98<br>4 | 132.40<br>8 | 8.789  | 8.894  | 0.105 | 34.467 | 34.383 | -0.08<br>4 | -0.100 | -3.082 | outside |
| 28 | 24-06-23 | 2 | 185.56<br>4 | 97.969      | 9.910  | 10.012 | 0.102 | 34.375 | 34.295 | -0.08<br>0 | -0.920 | -0.945 | outside |
| 29 | 07-07-23 | 2 | 156.82<br>3 | 126.21<br>9 | 9.722  | 10.144 | 0.422 | 34.285 | 34.128 | -0.15<br>7 | -1.667 | 0.352  | P14     |
| 30 | 15-07-23 | 2 | 138.72<br>9 | 143.29<br>6 | 10.226 | 10.307 | 0.080 | 34.136 | 34.140 | 0.004      | -0.853 | 0.526  | P14     |
| 31 | 23-07-23 | 2 | 130.90<br>2 | 150.93<br>4 | 10.235 | 10.341 | 0.106 | 34.257 | 34.130 | -0.12<br>7 | -1.242 | -0.755 | P14     |
| 32 | 01-08-23 | 2 | 124.40<br>9 | 158.65<br>0 | 9.799  | 10.201 | 0.402 | 34.126 | 33.936 | -0.19<br>0 | -2.327 | -0.891 | P14     |
| 33 | 29-08-23 | 5 | 110.82<br>9 | 171.17<br>8 | 10.254 | 10.392 | 0.137 | 34.076 | 33.878 | -0.19<br>8 | -1.479 | -2.058 | P14     |
| 34 | 30-09-23 | 2 | 141.94<br>0 | 142.50<br>7 | 9.615  | 9.932  | 0.317 | 34.235 | 34.074 | -0.16<br>1 | -0.287 | 0.041  | outside |
| 35 | 03-07-24 | 2 | 145.49<br>5 | 139.21<br>5 | 9.445  | 9.882  | 0.437 | 34.099 | 34.100 | 0.001      | -0.331 | 0.149  | outside |

**Table S3. Statistical significance of explanatory variables for the variability of oxygen, obtained by applying a sequential ANOVA (type I) to a generalized linear model (GLM) with a logit link function for the residual negative binomial distribution. (A) Bold values indicate significant effects ( $p < 0.05$ ).**

| Predictive variables | df | Deviance | Residual df | Residual Deviance | $p > ( \chi^2 )$ | ED (%)      |
|----------------------|----|----------|-------------|-------------------|------------------|-------------|
| Null, Oxygen         |    |          | 2625        | 4145.3            |                  |             |
| Salinity             | 1  | 343.80   | 2624        | 3801.5            | <b>&lt;0.01</b>  | <b>22.8</b> |
| Temperature          | 1  | 9.73     | 2623        | 3791.8            | 0.001            | 0.6         |
| Density              | 1  | 1155.10  | 2622        | 2636.7            | <b>&lt;0.01</b>  | <b>76.6</b> |
| Total Ekman          | 1  | 0.14     | 2621        | 2636.5            | 0.705            | 0.0         |

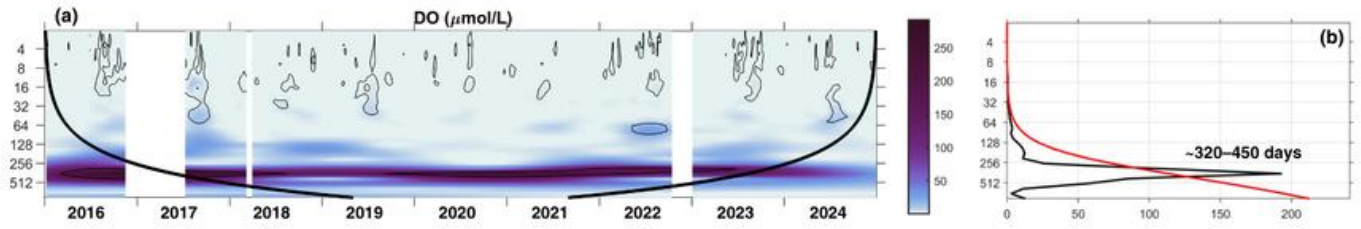

**Figure S1.** Continuous Morlet wavelet power spectrum of unfiltered dissolved oxygen (DO) at ~170 m depth. (a) Time-period distribution of the normalized wavelet power. Significant regions at the 95 % confidence level (black contours) are concentrated in the low-frequency band between ~320 and 450 d, indicating a dominance of interannual variability. The thick black curve denotes the cone of influence. (b) The global wavelet spectrum (black line) and corresponding 95 % significance level (red line), highlighting the spectral peak within the annual-to-interannual range.

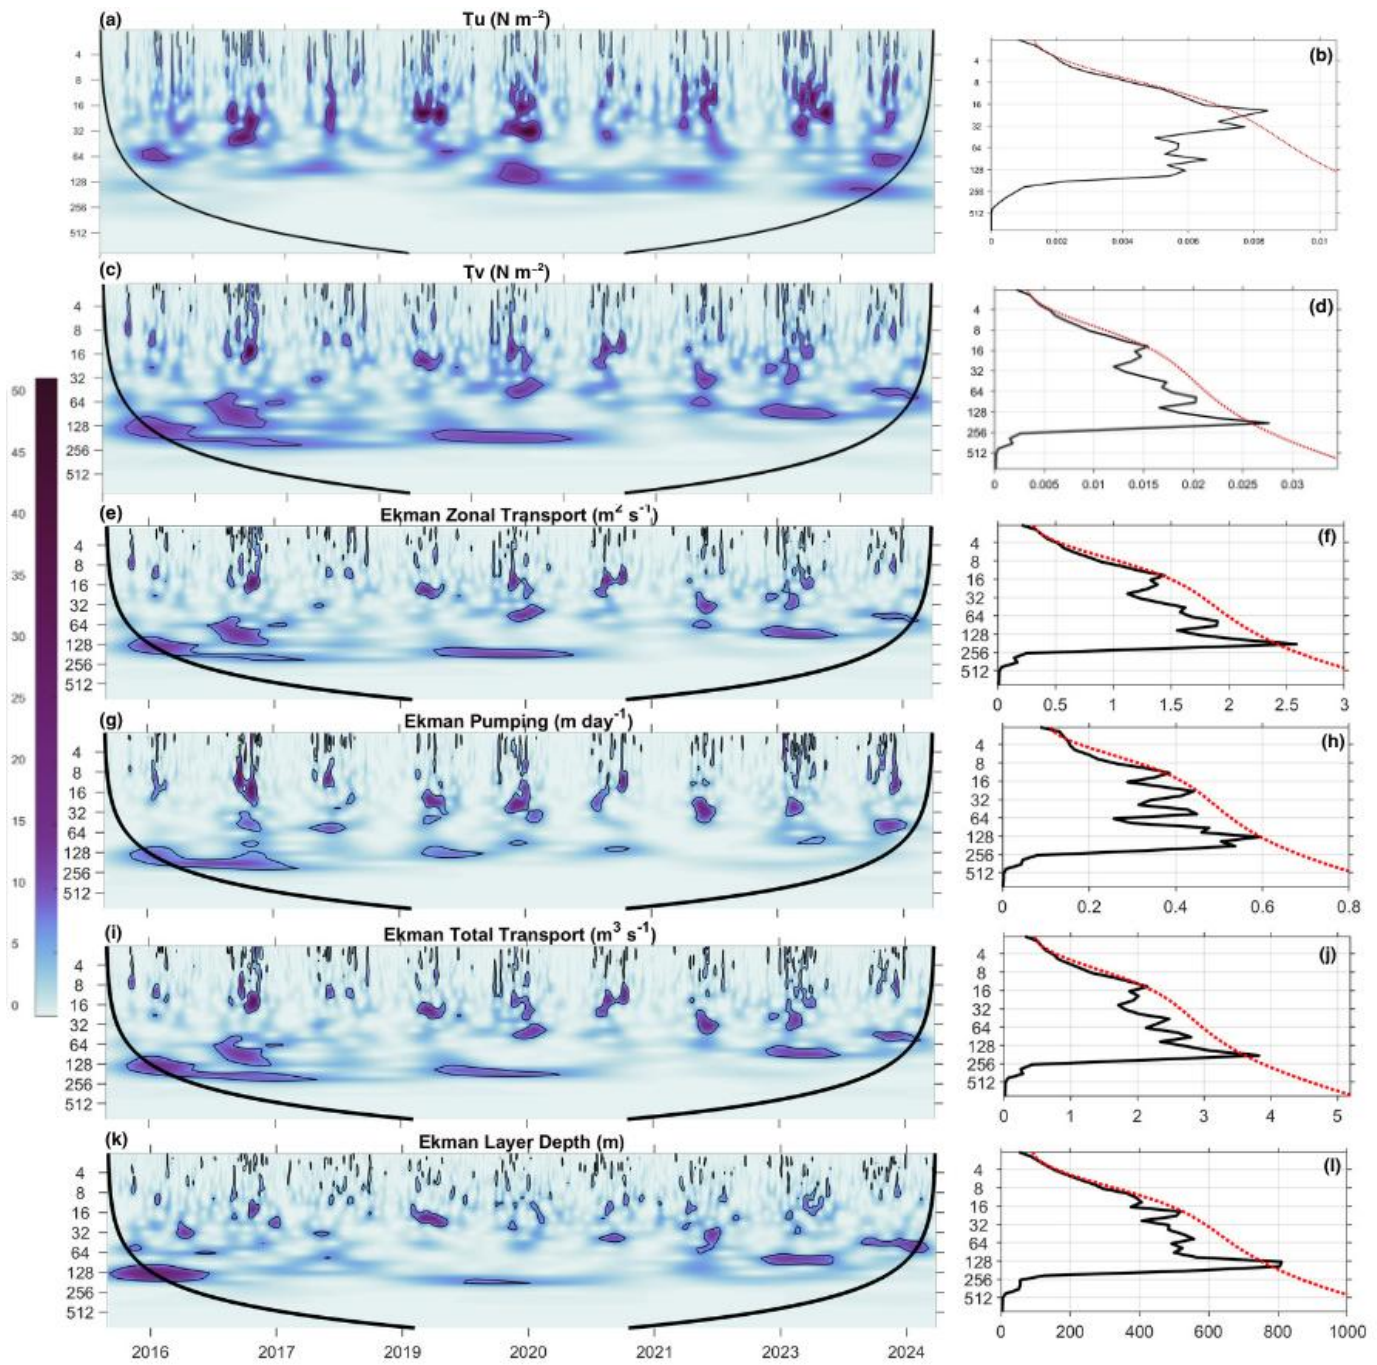

Figure S2. Wavelet coherence between high-pass filtered dissolved oxygen (DO) and wind-derived forcing variables (cutoff period: 250 d). Panels show the coherence between DO and (a) zonal wind stress ( $\tau_u$ ), (b) meridional wind stress ( $\tau_v$ ), (c) zonal Ekman transport ( $U_e$ ), (d) Ekman pumping ( $W_E$ ), (e) total Ekman transport ( $Ek_{total}$ ), and (f) Ekman layer depth ( $D_E$ ). Shading indicates coherence magnitude (0–1), and black contours denote the 95 % confidence level against a red-noise background. The thick black curve represents the cone of influence. Significant coherence is primarily concentrated within the synoptic and intraseasonal timescales.
